# Nanoscale dynamics of synaptic vesicle trafficking and fusion at the presynaptic active zone

Thirumalini Vaithianathan<sup>1</sup>, Diane Henry<sup>1</sup>, Wendy Akmentin<sup>1</sup>, and Gary Matthews<sup>1,2</sup>

<sup>1</sup>Department of Neurobiology and Behavior, Stony Brook University

<sup>2</sup>Department of Ophthalmology, Stony Brook University

## Abstract

The cytomatrix at the active zone (CAZ) is a macromolecular complex that facilitates the supply of release-ready synaptic vesicles to support neurotransmitter release at synapses. To reveal the dynamics of this supply process in living synapses, we used super-resolution imaging to track single vesicles at voltage-clamped presynaptic terminals of retinal bipolar neurons, whose CAZ contains a specialized structure—the synaptic ribbon—that supports both fast, transient and slow, sustained modes of transmission. We find that the synaptic ribbon serves a dual function as a conduit for diffusion of synaptic vesicles and a platform for vesicles to fuse distal to the plasma membrane itself, via compound fusion. The combination of these functions allows the ribbon-type CAZ to achieve the continuous transmitter release required by synapses of neurons that carry tonic, graded visual signals in the retina.

## Introduction

Neurons communicate at synapses, where chemical neurotransmitter is released from the presynaptic terminal by fusion of transmitter-containing synaptic vesicles with the plasma membrane. A macromolecular complex, the cytomatrix at the active zone (CAZ; Südhof, 2012) is thought to capture and organize synaptic vesicles to support neurotransmitter release by presynaptic terminals (Sigrist and Schmitz, 2011; Gundelfinger and Fijtova, 2012; Hallermann and Silver, 2013), but the dynamics of this process at living synapses remain elusive. In order to follow this supposed trafficking of vesicles in real time at the CAZ, methods are needed to label both vesicles and the active zone at living synapses. It is possible to label the living active zone using fluorescent Ribeye-binding peptide (RBP; Zenisek et al., 2004), which marks the synaptic ribbon found at the active zones of retinal bipolar cells (BPCs) and other neurons that release neurotransmitter continuously in response to graded changes in membrane potential (Matthews and Fuchs, 2010). However, monitoring the trafficking of tiny synaptic vesicles (30-50 nm in diameter) is a technical challenge, which we were nevertheless able to meet by targeting a photoactivatable fluorescent protein to synaptic vesicles and using super-resolution photoactivated localization microscopy (Betz et al., 2006) to track movements of single vesicles. This then allowed us to directly analyze the trafficking and fusion of vesicles at the active zone during ongoing neurotransmitter release.

## Results and Discussion

To track single vesicles, we targeted the photoactivatable fluorescent protein paRFP (Subach et al., 2010) to synaptic vesicles by fusing it to the C-terminus of the vesicle membrane protein Vglut1 (vesicular glutamate transporter 1). The resulting fusion protein was then inducibly expressed in transgenic zebrafish (Figure 1; Figure 1-figure supplement 1). Synaptic vesicles bearing Vglut1-paRFP participated normally in the vesicle cycle, since they were labeled by activity-dependent uptake of FM dye. By photoactivating Vglut1-paRFP at low density, we

ensured that a field of view contained only a single fluorescent synaptic vesicle, which we then localized using high-resolution confocal microscopy (Figure 1A-F; Figure 1-figure supplement 2). Both mobile and immobile vesicles were visible after photoactivation (Supplementary Movie 1), but the immobile vesicles were closely associated with ribbons (Figure 1A; Supplementary Movie 2), which were labeled with RBP introduced via a whole-cell patch pipette. Therefore, we conclude that the ribbon-associated vesicles are immobile because they are tethered to or near the ribbon itself (Figure 1F).

Vesicles docked at ribbons move very little in the absence of stimulation (Zenisek, 2008), and we therefore used the temporal jitter in the observed position of paRFP-labeled vesicles relative to ribbons to estimate the spatial precision of the localization method under our imaging conditions. A series of xy-images was acquired while the synaptic terminal was voltage-clamped at -60 mV to prevent release, and after averaging over 4-10 frames to reduce noise, the positions of the paRFP spot and ribbon were determined by fitting 2D-Gaussians as shown in Figure 1E. The localized vesicle position varied little during the 90-s imaging period (Figure 1G-I), within ranges that averaged 27 nm on the x-axis and 17 nm on the y-axis. Stimulus-induced vesicle movements on the ribbon of approximately a vesicle diameter (~30 nm) would therefore be resolvable by comparing averaged xy-images before and after stimulation.

### **Vesicle turnover and replenishment on ribbons**

What happens to the immobile ribbon-associated vesicles during transmitter release? To control release, isolated BPCs were voltage-clamped via a whole-cell pipette placed directly on the synaptic terminal (Figure 1-figure supplement 1B) and stimulated by brief depolarization to activate voltage-gated calcium channels (Figure 2A, inset), causing calcium influx that triggered synaptic vesicle fusion. BPCs exhibit two kinetically distinct components of transmitter release during depolarization (Vaithianathan and Matthews, 2014): a fast component depleted within 10 ms, and a slower component lasting hundreds of ms. We first determined how individual paRFP-labeled vesicles at the ribbon responded when the system was perturbed by releasing just the fast component, which is thought to represent the cohort of vesicles tethered to the ribbon nearest the plasma membrane (Matthews and Fuchs, 2010), where voltage-gated calcium channels reside.

On some trials after a 10-ms stimulus, a new stable paRFP spot appeared at the ribbon (Figure 2A,C), while on other trials, a previously present paRFP spot disappeared after the stimulus (Figure 2B,D), representing single-vesicle replenishment and fusion, respectively. When the loci of gained and lost paRFP spots were determined as illustrated in Figure 1 and plotted with respect to the center of the ribbon (Figure 2E), there was no difference in the distribution of appearances and disappearances along the axis parallel to the membrane (the y-axis;  $p=0.4$ , Wilcoxon rank test). However, disappearances clustered significantly closer to the plasma membrane than appearances (Figure 2E) along the axis perpendicular to the membrane (the x-axis;  $p<10^{-8}$ , Wilcoxon rank test). This pattern revealed by single-vesicle imaging is consistent with selective fusion of membrane-proximal synaptic vesicles during brief depolarization, but preferential recruitment of new vesicles at the opposite pole of the ribbon to replace those lost, as suggested previously from population behavior of vesicles labeled with FM dye (Vaithianathan and Matthews, 2014). A simple interpretation is that loss of membrane-proximal vesicles creates the opportunity for vesicles remaining on the ribbon to rearrange and occupy the vacated region, opening up “slots” for new vesicles at more distal positions on the ribbon.

## Vesicle redistribution on ribbons after stimulation

To determine whether vesicles remaining on the ribbon indeed changed position after depolarization, we measured the relative positions of single paRFP-labeled synaptic vesicles on the ribbon before and after 10-ms stimuli, or under the same conditions without stimulation. In the absence of stimulation, the position of labeled vesicles on the ribbon was stable, as shown by the histogram of displacement amplitude in Figure 2F. The great majority of such “displacements” were less than a vesicle diameter and are therefore attributable to noise. However, after 10-ms stimulation, displacements were larger (Figure 2F;  $p=0$ , Wilcoxon rank test), which is consistent with the prediction that the loss of ribbon-associated vesicles allows movement of remaining vesicles.

We next examined the direction of motion by plotting the vesicle displacement as a vector from the starting position. Without stimulation (Figure 2G), vector amplitudes were mostly within the range expected for imaging noise (93% were  $<50$  nm; see inset in Figure 2G for an expanded view), and the direction of the vector was equally likely to be toward or away from the membrane (positive and negative  $\Delta\Delta x$ , respectively, indicated by green and red vectors in Figure 2G). The average vector amplitude was therefore zero (black dot at the center of vector clusters). Rare larger excursions were also observed, which may reflect a low rate of genuine vesicle movement occurring spontaneously on the ribbon at the holding potential of  $-60$  mV. After 10-ms stimuli (Figure 2H), vector amplitudes were significantly larger (77% were  $>50$  nm;  $p<10^{-6}$ , Wilcoxon rank test), and there was a significant tendency for movement toward the membrane, with 70% of vectors having a positive  $\Delta\Delta x$  ( $p=0.0008$  that  $+$  and  $-$   $\Delta\Delta x$  were equally likely, by sign test). Amplitudes of vectors both toward the membrane (green vectors in Figure 2H) and away from the membrane (red vectors) were significantly larger after stimulation than in the absence of stimulation ( $+\Delta\Delta x$ :  $89 \pm 8$  nm vs.  $17 \pm 1$  nm,  $p=0$ , Wilcoxon rank test;  $-\Delta\Delta x$ :  $59 \pm 6$  nm vs.  $16 \pm 1$  nm,  $p<10^{-12}$ , Wilcoxon rank test). Overall, the average vector after stimulation (black arrow, Figure 2H) was a displacement by 33 nm toward the membrane, or approximately 1 vesicle diameter. Since movements both toward and away from the plasma membrane were enhanced by stimulation, the results suggest a mechanism of passive diffusion of tethered vesicles along the ribbon, such as the recently proposed “crowd-surfing” model (Graydon et al., 2014), rather than a directed motor. In such a passive mechanism, the net movement toward the membrane that we observed after stimulation is due to preferential release of vesicles near the membrane by 10-ms depolarization, creating the opportunity for more distal vesicles to diffuse into the vacated positions.

## Vesicle dynamics during the sustained component of release

In addition to the rapid burst of release at the onset of depolarization, ribbon synapses also release neurotransmitter continuously during sustained depolarization. To examine vesicle trafficking during this sustained component of release, we measured fluorescence along a short scan-line perpendicular to the plasma membrane, which yielded x-t raster plots that were analyzed as shown in Figure 3 to determine the x-axis position of paRFP spots relative to the synaptic ribbon and the plasma membrane (also see Image analysis section of Materials and Methods). Although paRFP fluorescence was detectable in individual line scans (Figure 3E), the noise level precluded accurate localization of the emitter by fitting a Gaussian function to the x-axis intensity profile of single line scans. In the example shown in Figure 3E, for instance, the peak of the fitted Gaussian varied over a range of 170 nm in 16 consecutive individual lines. However, averaging across 4 scan lines reduced the range of variation of fitted positions to 20

nm, as shown in Figure 3F. As a result, we routinely averaged over 4-10 lines, depending on the noise level in a particular experiment, in order to achieve localization along the x-axis with a resolution of approximately one vesicle diameter. After such averaging, the position of a labeled vesicle in the absence of stimulation was stable for many seconds within a range of  $\pm 25$  nm (Figure 3G,H), which we take as the spatial precision of the line-scan method.

We next examined changes in paRFP-labeled vesicles at ribbons during activation of calcium current elicited by depolarizing voltage-clamp steps from -60 to -15 mV for 500-5000 ms. During sustained depolarization, previously stable paRFP spots often disappeared from the ribbon, either without a change in position before loss (e.g., Figure 4A) or after moving toward the membrane (e.g., Figure 4B,C). Whether vesicles moved or not before disappearance depended on starting position with respect to the membrane (Figure 4D): vesicles nearer the plasma membrane (positive starting positions in Figure 4D) did not consistently move before disappearing, while distal vesicles (negative starting positions) moved toward the membrane before loss. Since membrane-proximal vesicles did not move while distal vesicles moved toward the ribbon center, the histogram of final paRFP positions just prior to disappearance was broad (Figure 4E) and covered the full range of ribbon-associated vesicle positions (cf., Figure 1F). During disappearance, paRFP fluorescence did not cease abruptly, as would occur for bleaching, but instead declined along a Gaussian time course, which is consistent with diffusion of the emitter away from the scanned region (Figure 4-figure supplement 1). It is uncertain at present whether this diffusion reflects movement of the Vglut1-paRFP protein itself, as would occur for example if the protein incorporated into the plasma membrane after vesicle fusion, or dissociation of an intact vesicle from the ribbon.

### **Locus of vesicle fusion revealed by pHluorin reporter**

Are vesicles that disappear from the ribbon during sustained depolarization simply shed from the ribbon without participating in release, or do they somehow fuse and release their contents without approaching the plasma membrane? To determine when ribbon-associated vesicles undergo fusion, we generated transgenic zebrafish that express the exocytosis reporter SypHy (Granseth et al., 2006) (Synaptophysin-pHluorin fusion protein) or Vglut1-pHluorin (Voglmaier et al., 2006) under control of heat-shock promoter. Since pHluorin-fusion proteins mixed with pre-existing native vesicle proteins, pHluorin events were sparse during depolarization, allowing precise localization with respect to the ribbon, in the same manner as paRFP-labeled vesicles. For 2-color imaging, ribbons were labeled with deep-red CF633-RBP, which did not interfere with pHluorin fluorescence. Under these conditions, unitary pHluorin events representing vesicle fusion were observed in x-t raster plots during sustained depolarization (Figure 5A,B), but not in the absence of stimulation. The fluorescence intensity profile perpendicular to the membrane was analyzed as described for paRFP to determine the position of pHluorin events relative to the ribbon (Figure 5C,D). The histogram of event positions measured in this way showed that pHluorin signals did not arise solely at the membrane, but instead were broadly spread across the ribbon. A simple explanation is that the pHluorin events distal to the membrane represent fusion of synaptic vesicles with other ribbon-attached vesicles, which have themselves already undergone exocytosis and provide a path to the extracellular space. This is consistent with previous work (Matthews and Sterling, 2008) using electron microscopy, which suggested the existence of such vesicle-vesicle compound fusion at ribbon synapses of BPCs.

In this study, we exploited the special features of ribbon synapses of retinal sensory neurons to observe the trafficking of single synaptic vesicles associated with the CAZ during ongoing



transmitter release. Our studies demonstrated a dual role for the synaptic ribbon in neurotransmitter release at the active zone, serving as a conduit for diffusion of tethered synaptic vesicles and as a platform for vesicles to fuse distal to the plasma membrane, likely via compound fusion. Diffusion dominates for ribbon-associated vesicles farthest from the plasma membrane, which move toward the center of the ribbon prior to loss during sustained depolarization. Compound fusion dominates for ribbon-associated vesicles near the membrane, perhaps because calcium levels are higher at that location during depolarization (Vaithianathan and Matthews, 2014). Our results set the stage for models of synaptic vesicle trafficking and fusion at the active zone that incorporate calcium signaling, the kinetics of tethered diffusion of vesicles, and vesicle-vesicle fusion at a distance from the plasma membrane.

## Materials and Methods

### Animals

All animal procedures were in accord with NIH guidelines and followed protocols approved by the Institutional Animal Care and Use Committee of Stony Brook University. To generate transgenic zebrafish, transgenes were assembled using the Gateway-based Tol2kit (Kwan et al., 2007), by constructing appropriate middle-entry and 3'-entry vectors for combination with *hsp70* 5'-entry vector into a destination vector that included flanking Tol2 transposons and a reverse-orientation *cmhc2*:EGFP cassette for identifying transgenic embryos. To construct Vglut1 fused at the C-terminus with PATagRFP, cDNA for full-length Vglut1a (GenBank NM\_001098755) was obtained by RT-PCR from zebrafish retinal total RNA and cloned into a middle-entry vector. PATagRFP cDNA was a gift from Dr. Vladimir Verkhusa (Albert Einstein College of Medicine) and was cloned into a 3'-entry vector. Zebrafish SyphY was generated as described (Zhu et al., 2009), using cDNA for Synaptophysin-b (GenBank NM\_001030242) obtained by RT-PCR from zebrafish retinal total RNA and cDNA encoding super-ecliptic pHluorin (Sankaranarayanan et al., 2000) obtained by PCR from a Syphluorin vector (Addgene 37003; Zhu et al., 2009). The resulting zebrafish SyphY construct was then cloned into a middle-entry vector. Zebrafish VGlut1-pHluorin (Voglmaier et al., 2006) was produced in a similar manner. The assembled *hsp70* transgenes were injected into single-cell zebrafish embryos along with Tol2 mRNA, and transgenic embryos were selected at 24 hours postfertilization based on GFP fluorescence in the heart driven by *cmhc2*:EGFP. Transgenic fish were tested for germline transmission of the transgene at 3 months, and the positive progeny were then used to establish transgenic lines. For experiments, transgenic fish >3 months old of both sexes were exposed to 37° C water for 2 hours, kept overnight for protein expression, and used the next day.

### Patch-clamp recordings and imaging

Bipolar neurons were isolated from adult zebrafish retina as described previously (Vaithianathan and Matthews, 2014; Vaithianathan et al., 2013), and whole-cell recordings were made within 2 h of dissociation, using a patch pipette placed directly on the synaptic terminal. Pipette and bath solutions were similar to those used for goldfish bipolar cells (Heidelberger and Matthews, 1992), except the pipette solution included 3 mM reduced glutathione as a free-radical scavenger and fluorescent RBP peptide to mark ribbons (Zenisek et al., 2004). Although it was concentrated at ribbons, fluorescent RBP also filled the entire cell, allowing the border of the synaptic terminal to be visualized with fluorescence imaging (Figure 3-figure supplement 1). Voltage-clamp data were acquired using a HEKA EPC-9 amplifier controlled by PatchMaster software (HEKA). Fluorescence images were acquired using Olympus FluoView software

controlling an Olympus FV1000/IX-81 laser-scanning confocal microscope equipped with a 60X 1.42 NA oil-immersion objective. Separate xy-scanners allowed simultaneous imaging and photoactivation. The focal plane was carefully adjusted to bring labeled ribbons into sharp focus, avoiding the region of high curvature near the top of the terminal and the plane of adherence of the membrane to the glass coverslip at the bottom of the terminal. This procedure minimized curvature of the plasma membrane in the z-axis within the optical section and therefore facilitated localization of the plasma membrane with respect to the ribbon. Either x-y raster scans or x-t line scans were acquired of a zoomed region near a selected ribbon, depending on the experimental goals. Logic pulses exchanged between patch-clamp and imaging computers synchronized acquisition of electrophysiological and imaging data, and precise timing of imaging relative to voltage-clamp stimuli was established using PatchMaster to digitize horizontal-scan synch pulses from the imaging computer in parallel with the electrophysiological data. Electron microscopy of isolated bipolar cells was performed as described previously (Matthews and Sterling, 2008; Vaithianathan et al., 2013).

### Image analysis

FluoView images of x-y and x-t scans were imported into ImageJ for initial processing and analysis, and subsequent analysis was performed in Igor Pro (Wavemetrics). For analysis of changes elicited by brief stimuli, 4-10 paRFP images were collected, followed by 10-ms depolarization or no stimulation, and the sequence was repeated at 18-s intervals. Images of the ribbon marked with RBP were taken either just before the series of RFP images, or in sequential alternation with each RFP image of the series. Images were then averaged for each repeat, and the positions of paRFP spots and the ribbon were determined from the peak of a 2D Gaussian fitted using Igor Pro. Positions of paRFP spots were then expressed as  $\Delta x$  and  $\Delta y$  relative to the center of the ribbon for each repeat. Changes in relative RFP position across repeats were then calculated as  $\Delta\Delta x$  and  $\Delta\Delta y$ . For analysis of changes during sustained stimuli, a line perpendicular to the membrane at a ribbon location was scanned at intervals of  $\sim 1.4$  ms, with alternation between RBP and paRFP or pHluorin channels on successive lines, or on successive frames. The resulting x-t images were typically averaged in ImageJ over 2 pixels in the x-axis and 5-8 lines in the t-axis to reduce noise. Positions of the ribbon and paRFP spots along the scanned line were determined by fitting the x-axis intensity profile with the equation  $f(x) = s(x) + g(x)$ , where  $s(x)$  is a sigmoid describing the transition from intracellular to extracellular background fluorescence at the edge of the cell, given by  $s(x) = b/(c/(1-\exp((x_{1/2}-x)/d)))$ , and  $g(x)$  is a Gaussian representing the fluorescence of RBP, paRFP, or pHluorin, given by  $g(x) = a*\exp(-(x-x_0)^2/w^2)$ . The parameters  $x_{1/2}$  and  $x_0$  were taken as the x-axis positions of the plasma membrane and the fluorescence emitter, respectively. The parameter  $b$  is intracellular background fluorescence,  $c$  is extracellular background fluorescence,  $d$  is the slope factor of the sigmoid,  $a$  is the peak amplitude of emitter fluorescence, and  $w$  is  $\sqrt{2}*\sigma$  of the Gaussian. In practice, the latter parameters were highly constrained by the data or by the measured PSF, essentially leaving only  $x_{1/2}$  and  $x_0$  as free parameters in the fitting.

### Statistical Methods

No statistical method was used to predetermine sample size. Non-parametric tests (Wilcoxon rank test; sign test) were used to determine statistical significance. Variance in estimates of the population mean is reported as  $\pm$ sem.

## **Acknowledgements**

This work was supported by NIH grant EY003821 to G.M.

**Corresponding author:** Dr. Gary Matthews, Department of Neurobiology and Behavior, Stony Brook University, Stony Brook, NY 11794-5230, USA. Gary.G.Matthews@stonybrook.edu

## References

- Betzig E, Patterson GH, Sougrat R, Lindwasser OW, Olenych S, Bonifacino JS, Davidson MW, Lippincott-Schwartz J, Hess HF. 2006. Imaging intracellular fluorescent proteins at nanometer resolution. *Science* **313**:1642-1645.
- Granseth B, Odermatt B, Royle SJ, Lagnado L. 2006. Clathrin-mediated endocytosis is the dominant mechanism of vesicle retrieval at hippocampal synapses. *Neuron* **51**:773-786.
- Graydon CW, Zhang J, Oesch NW, Sousa AA, Leapman RD, Diamond JS. 2014. Passive diffusion as a mechanism underlying ribbon synapse vesicle release and resupply. *J. Neurosci.* **34**, 8948-8962. doi: 10.1523/JNEUROSCI.1022-14.2014.
- Gundelfinger ED, Fejtova A. 2012. Molecular organization and plasticity of the cytomatrix at the active zone. *Curr. Opin. Neurobiol* **22**: 423-430. doi: 10.1016/j.conb.2011.10.005.
- Hallermann S, Silver RA. 2013. Sustaining rapid vesicular release at active zones: potential roles for vesicle tethering. *Trends Neurosci* **36**: 185-194. doi: 10.1016/j.tins.2012.10.001.
- Heidelberger R, Matthews G. 1992. Calcium influx and calcium current in single synaptic terminals of goldfish retinal bipolar neurons. *J. Physiol.* **447**, 235-256.
- Kwan K.M .et al. 2007. The Tol2kit: a multisite gateway-based construction kit for Tol2 transposon transgenesis constructs. *Dev. Dyn.* **236**, 3088-3099.
- Matthews G, Sterling P. 2008. Evidence that vesicles undergo compound fusion on the synaptic ribbon. *J. Neurosci.* **28**, 5403-5411. doi: 10.1523/JNEUROSCI.0935-08.2008.
- Matthews G, Fuchs P. 2010. The diverse roles of ribbon synapses in sensory neurotransmission. *Nat. Rev. Neurosci.* **11**, 812-822. doi: 10.1038/nrn2924.
- Sankaranarayanan S, De Angelis D, Rothman JE, Ryan TA. 2000. The use of pHluorins for optical measurements of presynaptic activity. *Biophys. J.* **79**, 2199-2208.
- Sigrist SJ, Schmitz D. 2011. Structural and functional plasticity of the cytoplasmic active zone. *Curr. Opin. Neurobiol.* **21**, 144-150. doi:10.1016/j.conb.2010.08.012.
- Subach FV, Patterson GH, Renz M, Lippincott-Schwartz J, Verkhusha VV. 2010. Bright monomeric photoactivatable red fluorescent protein for two-color super-resolution sptPALM of live cells. *J. Am. Chem. Soc.* **132**, 6481-6491. doi:10.1021/ja100906g.
- Südhof, T.C. 2012. The presynaptic active zone. *Neuron* **75**, 11-25. doi: 10.1016/j.neuron.2012.06.012.
- Vaithianathan T, Zanazzi G, Henry D, Akmentin W, Matthews G. 2013. Stabilization of spontaneous neurotransmitter release at ribbon synapses by ribbon-specific subtypes of complexin. *J. Neurosci.* **33**, 8216-8226. doi: 10.1523/JNEUROSCI.1280-12.2013.

Vaithianathan T, Matthews G. 2014. Visualizing synaptic vesicle turnover and pool refilling driven by calcium nanodomains at presynaptic active zones of ribbon synapses. *Proc. Natl. Acad. Sci. USA* **111**, 8655-8660. doi:10.1073/pnas.1323962111.

Voglmaier, S.M. *et al.* 2006. Distinct endocytic pathways control the rate and extent of synaptic vesicle protein recycling. *Neuron* **51**, 71-84.

Zenisek D, Horst NK, Merrifield C, Sterling P, Matthews G. 2004. Visualizing synaptic ribbons in the living cell. *J. Neurosci.* **24**, 9752-9759.

Zenisek D. 2008. Vesicle association and exocytosis at ribbon and extraribbon sites in retinal bipolar cell presynaptic terminals. *Proc. Natl. Acad. Sci. USA* **105**, 4922-4927.

Zhu Y, Xu J, Heinemann SF. 2009. Two pathways of synaptic vesicle retrieval revealed by single-vesicle imaging. *Neuron* **61**, 397-411. doi:10.1016/j.neuron.2008.12.024.



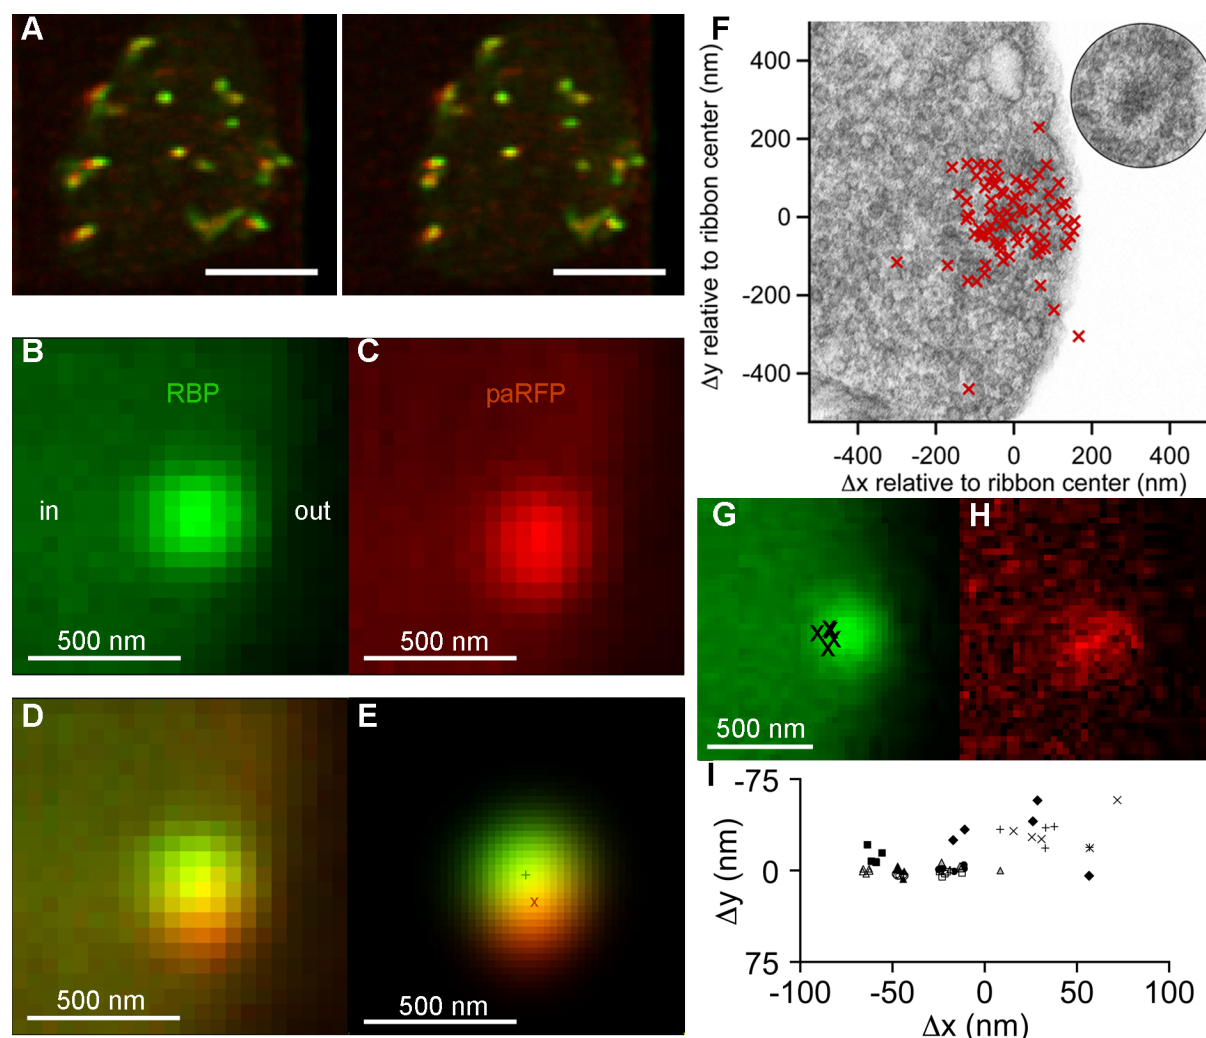

**Figure 1: Synaptic vesicles labeled with Vglut1-paRFP stably associate with synaptic ribbons at the active zone.** (A) Stereogram of a 3D reconstruction from a series of confocal optical sections through the synaptic terminal of a zebrafish BPC, showing photoactivated Vglut1-paRFP (red) near synaptic ribbons (green). A rotating view of the reconstruction is provided in Supplementary Movie 2. Scale bar = 2  $\mu$ m. Details of recording and photoactivation are provided in Figure 1-figure supplement 1. (B) Close-up view of a synaptic ribbon labeled with green-fluorescent RBP, which also fills the cytoplasm. Outside of the cell is to the right, which is the standard orientation adopted for all images. Average of 128 frames. (C) View of the same region showing a single Vglut1-paRFP spot. (D) Superposition of images from B and C. (E) 2D Gaussians (Figure 1-figure supplement 2) fitted to RBP and paRFP fluorescence, with peaks marked by + and X respectively. (F) Positions of 81 paRFP spots (red Xs) relative to the center of the RBP-labeled ribbon, superimposed on an electron micrograph of a ribbon in a zebrafish BPC. The inset reproduces the ribbon image without overlaid paRFP centroids. (G) Ribbon with superimposed positions of a paRFP spot, shown by Xs, followed for 90 s without stimulation. (H) Example of paRFP image, averaged over 10 frames. (I) Stability of paRFP location in the absence of stimulation for 10 experiments. Each symbol shows an individual peak location, and the different symbol types show results for a particular experiment.

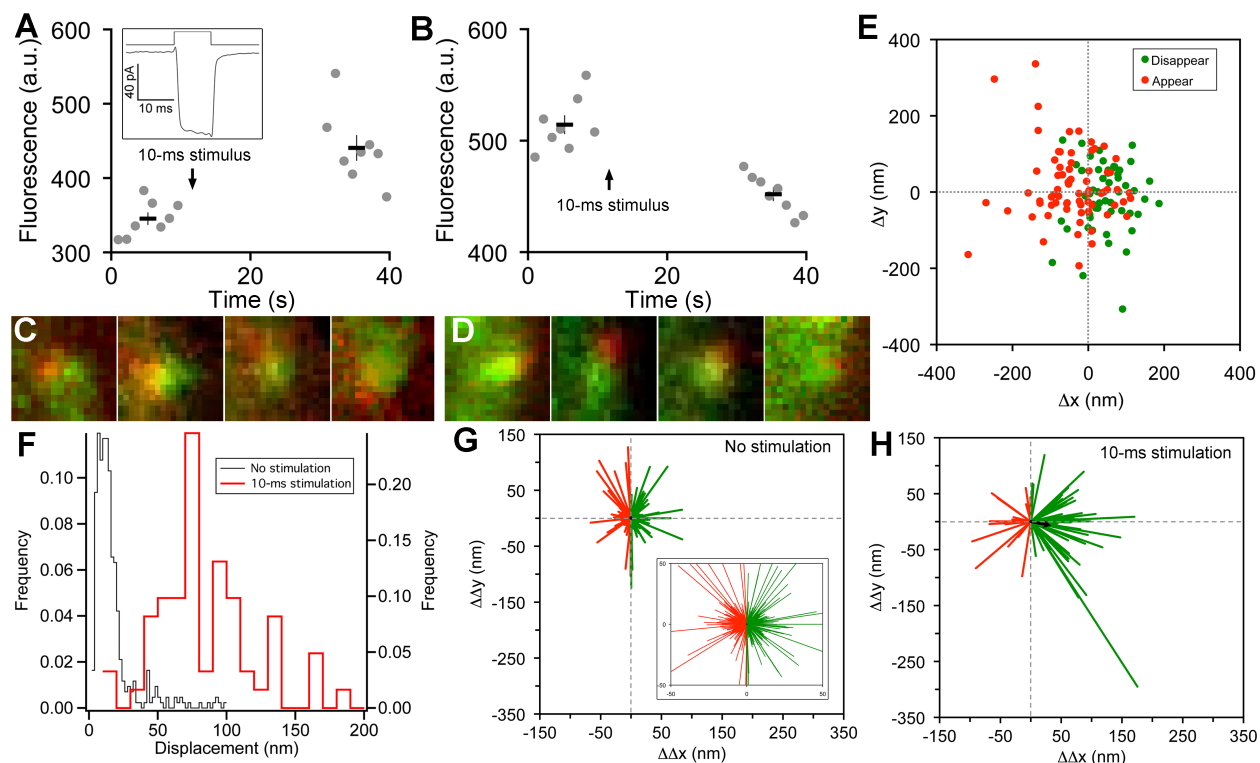

**Figure 2: Vesicle release, replenishment, and movement elicited by brief depolarization. (A)**

Example of an increase in paRFP fluorescence after a 10-ms depolarization from -60 mV to 0 mV, which evoked the  $\text{Ca}^{2+}$  current shown in the inset. Data points show fluorescence for individual frames, and the thick lines show the average ( $\pm$  sem) fluorescence over 8 frames before and after the stimulus. **(B)** An instance where depolarization caused a loss of paRFP fluorescence. **(C)** Representative examples of averaged images after depolarization for trials in which paRFP-labeled vesicles appeared post-stimulus. **(D)** Examples of averaged images before depolarization for trials in which paRFP-labeled vesicles disappeared post-stimulus. **(E)** Loci of paRFP-labeled vesicles with respect to the center of ribbon for 59 disappearances (green circles) and 71 appearances (red circles). **(F)** Histogram of displacement amplitude after 10-ms stimulation (red line) for 64 paRFP-labeled vesicles that were present before and after depolarization, compared with displacement histogram for 437 paRFP-labeled vesicles in the absence of stimulation (black line). Displacement =  $(\Delta\Delta x^2 + \Delta\Delta y^2)^{0.5}$ , where  $\Delta\Delta x$  and  $\Delta\Delta y$  are changes in paRFP locus relative to the center of the ribbon. **(G)** Displacement vectors without stimulation (N=437), shown on an expanded scale in the inset. The black dot in the center is the average vector. **(H)** Displacement vectors after 10-ms depolarization (N=64).

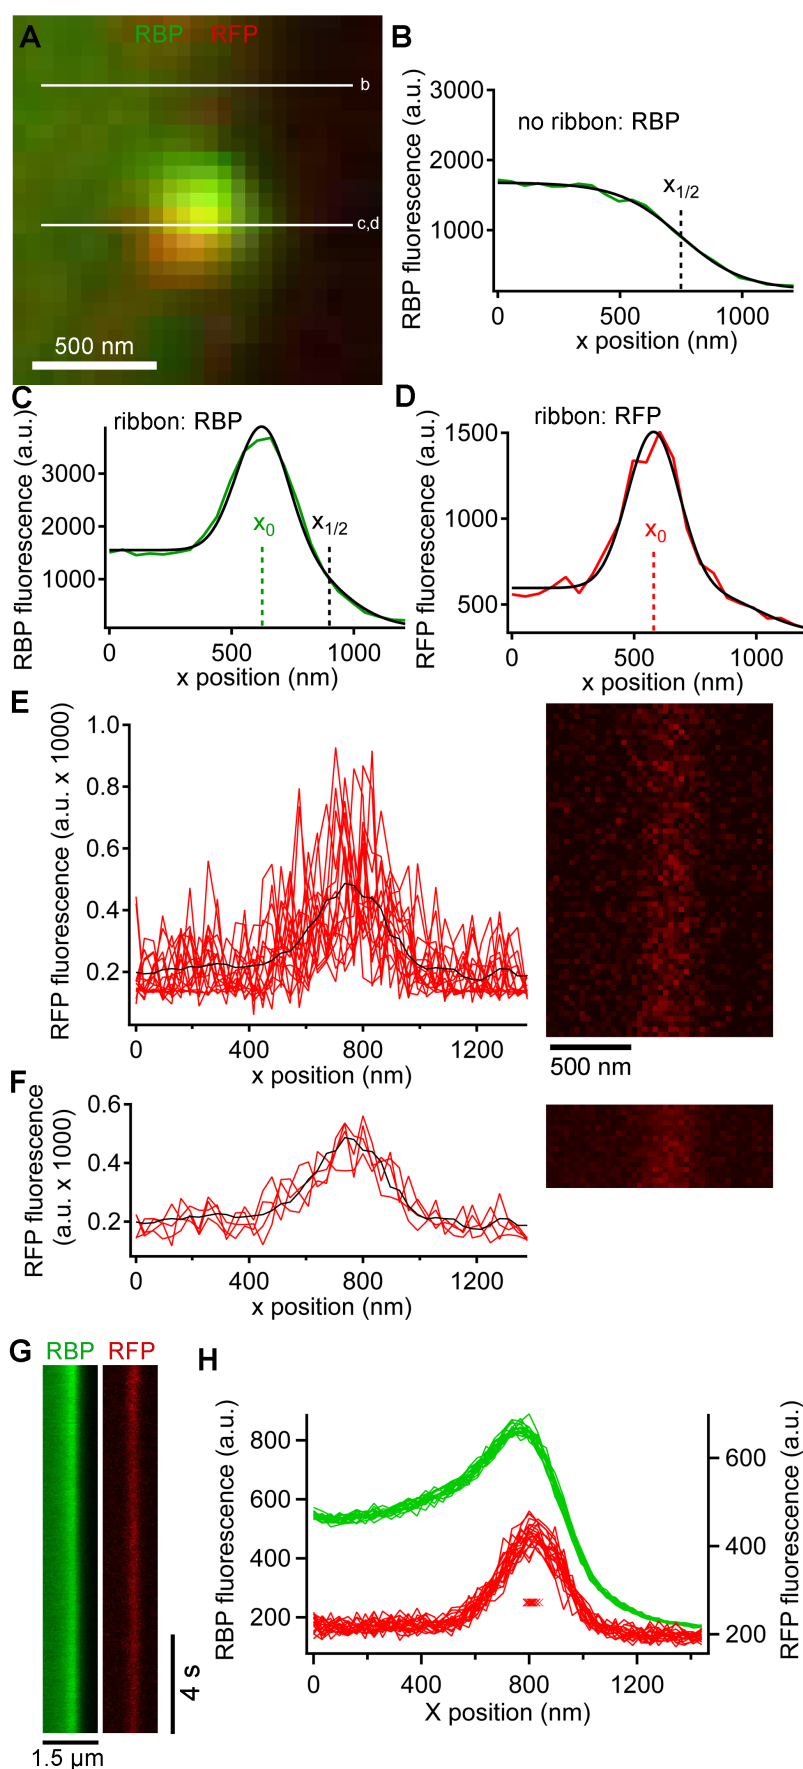

**Figure 3: Generation and analysis of line scan data.**

(A) Scan lines were positioned perpendicular to the plasma membrane, extending from the intracellular side of the ribbon into the extracellular space. For illustrative purposes, a second scan line is shown at a non-ribbon location. Lower-case letters show line positions for panels B-D. (B) Intensity profile of green RBP fluorescence at the non-ribbon location. The parameter  $x_{1/2}$  from the sigmoid fit (black line) is taken as the position of the membrane (see Materials and Methods). (C) Intensity profile of green RBP fluorescence at the ribbon. The parameter  $x_0$  is the peak of the Gaussian fit, giving the x-position of the center of the ribbon (see Methods). (D) Intensity profile of paRFP fluorescence at the ribbon, with the x-position of the labeled vesicle given by  $x_0$ . (E) Example of x-t image of paRFP spot at a ribbon, consisting of 64 line scans (right) taken over 472 ms. X-axis intensity profiles for are plotted (left) for the first 16 line scans to

illustrate the noise within and across individual line scans. The superimposed black line shows the average of all 64 lines. **(F)** Data from E averaged over 4 lines to reduce noise and allow more precise localization of the paRFP spot along the x-axis. The intensity profiles show the first 4 of the temporally averaged line scans, with the average for all lines superimposed in black. **(G)** Example x-t images averaged over 5 line scans, showing a stable paRFP-labeled synaptic vesicle associated with a ribbon, labeled in green with RBP. **(H)** Intensity profiles of RBP (green) and paRFP (red) taken in successive 406-ms intervals from the images in G. The red Xs show the position of  $x_0$  for each paRFP trace, which varied over a range of 48 nm during the 15-s recording.

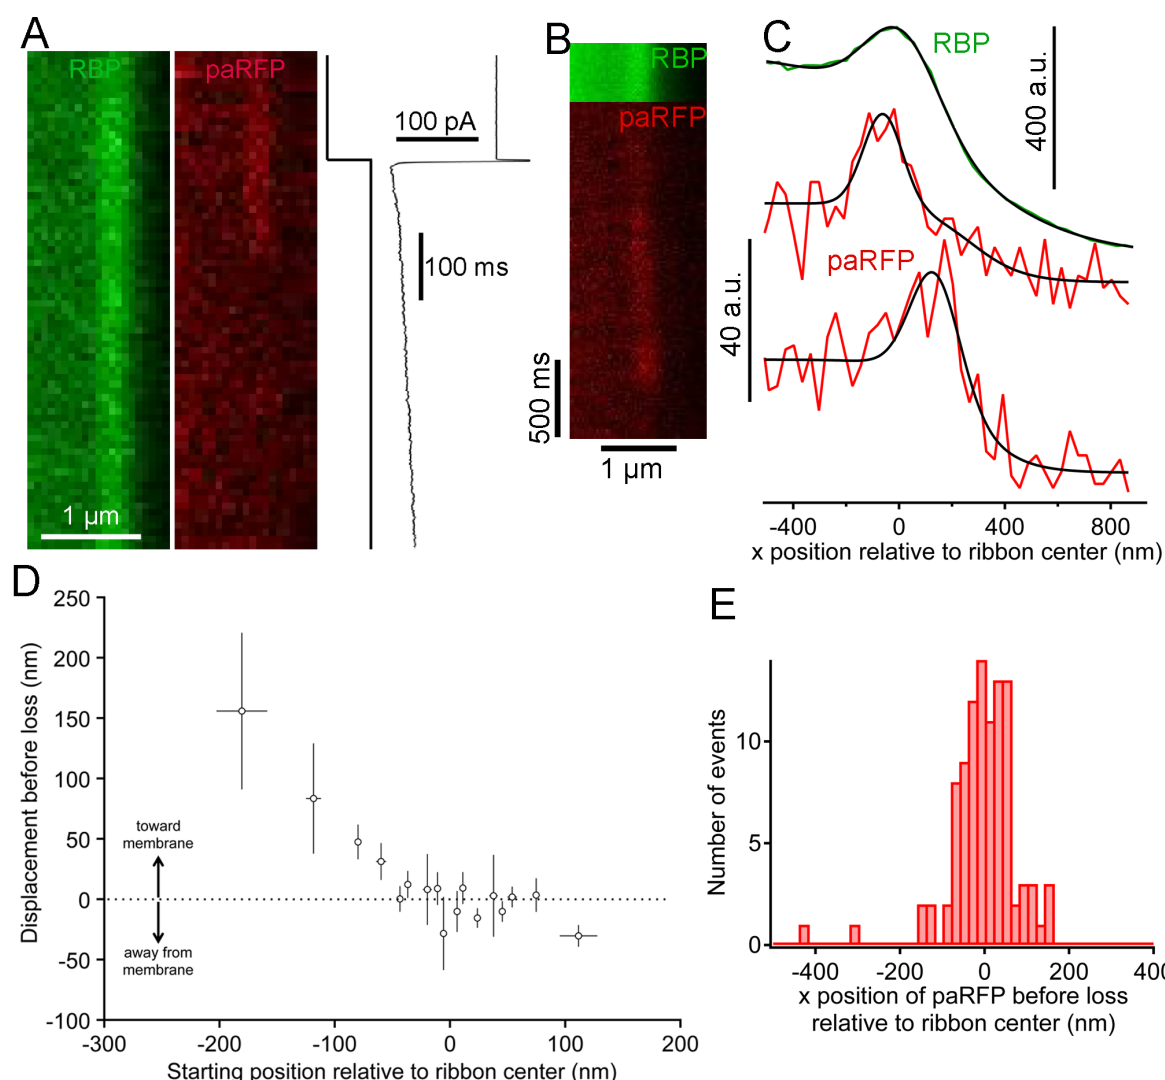

**Figure 4: Movement and loss of vesicles during sustained depolarization.** (A) Example x-t images in which a previously stable paRFP-labeled vesicle disappeared from view during sustained depolarization. The timing of depolarization and the evoked  $\text{Ca}^{2+}$  current are shown to the right. Analysis of x-t line scan images is described in Figure 3-figure supplement 1. (B) Example showing a paRFP-labeled vesicle that appeared distal to the center of the ribbon during sustained depolarization, moved toward the membrane, and disappeared along a Gaussian time course (Figure 3-figure supplement 2). (C) Fluorescence intensity profiles along the x-axis for the example in panel B, showing ribbon position (green) and paRFP positions at appearance and disappearance (red). Black lines are fits described in Figure 3-figure supplement 1. (D) Displacement amplitude for 88 paRFP-labeled vesicles along the x-axis prior to disappearance, as a function of initial starting position relative to the center of the ribbon. Positive and negative displacements are movements toward and away from the membrane, respectively. Open circles show the average of groups of 5 points binned by starting position. Error bars:  $\pm 1$  sem. Positive starting positions are nearer the membrane, and negative positions are farther away. (E) Histogram of final positions of paRFP-labeled vesicles along the x-axis just before disappearance.



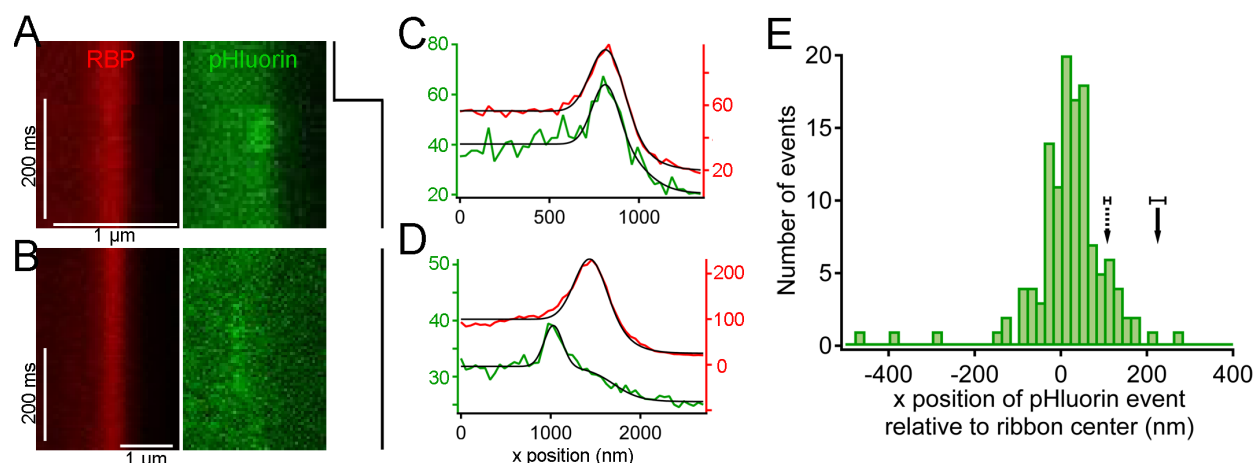

**Figure 5: Synaptic vesicle exocytosis reported by pHluorin occurs at a distance from the plasma membrane.** (A) (B) Examples of x-t images showing pHluorin events from SyphY (green) at ribbons during sustained depolarization. Ribbon fluorescence from deep-red CF633-RBP is pseudocolored red. (C) (D) Fluorescence intensity profiles along the x-axis for RBP (red) and pHluorin (green) for the examples in A and B. Black lines are fits as described in Figure 3-figure supplement 1. (E) Histogram of the position of 127 pHluorin events from SyphY and Vglut1-pHluorin during sustained depolarization. The solid arrow shows the average relative position of the plasma membrane, estimated as described in Methods (error bar:  $\pm 1$  sem). The dashed arrow shows the estimated position of the membrane at the top and bottom of the optical section, assuming that membrane curvature observed along the y-axis for each x-y image also applied in the z-axis. Most of the pHluorin events fell outside the range of membrane positions between the two arrows.

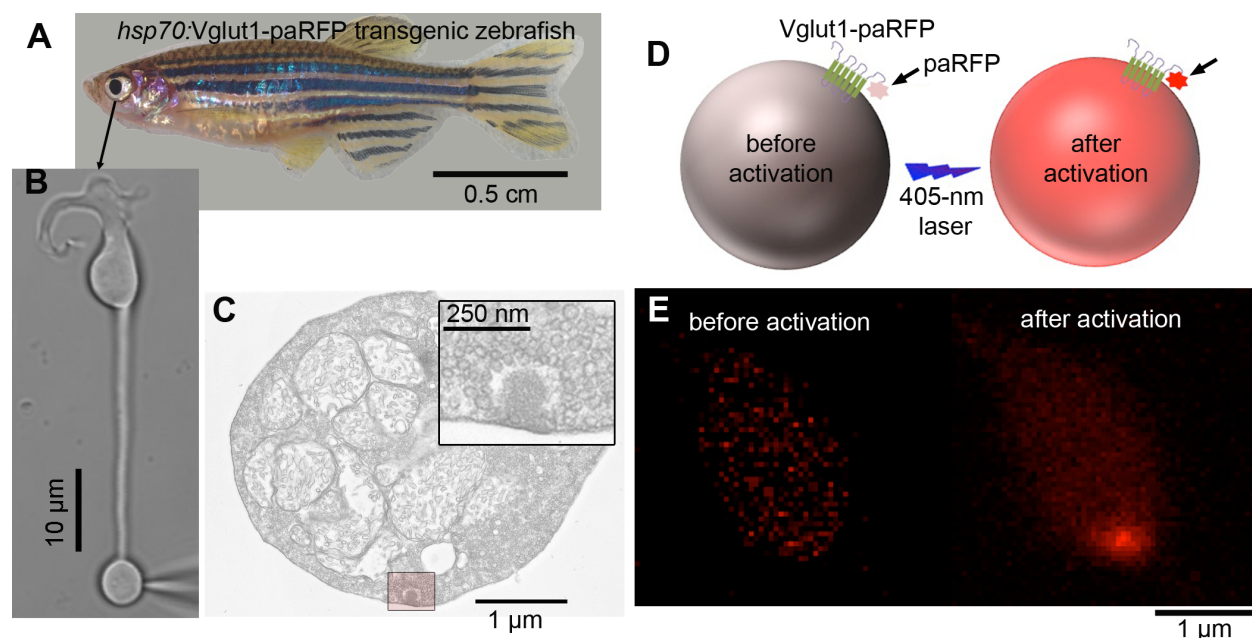

**Figure 1-figure supplement 1: Overview of the experimental procedure.** (A) Retinas were removed from transgenic zebrafish that expressed Vglut1-paRFP fusion protein after heat shock. (B) Intact, acutely dissociated retinal BPCs were voltage-clamped via a whole-cell patch pipette placed on the synaptic terminal. (C) Electron micrograph showing the synaptic terminal of a zebrafish BPC, with the boxed region around a ribbon at higher magnification in the inset. Ribbons are surrounded by tethered synaptic vesicles. (D) Cartoon illustrating photoactivation of paRFP by 405-nm light. (E) Example of red fluorescence in the synaptic terminal before and after photoactivation.

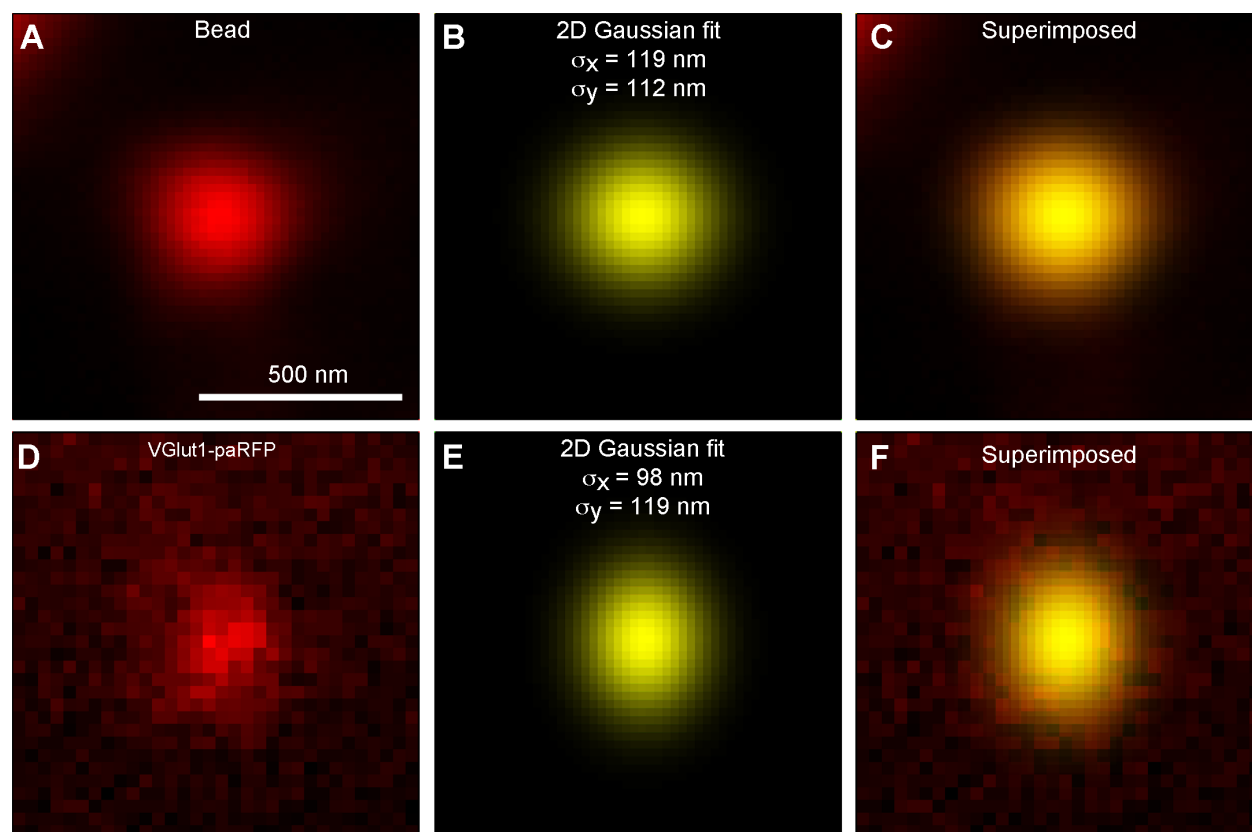

**Figure 1-figure supplement 2: paRFP spots match the point-spread function of the microscope.** (A) X-y image of a 27-nm fluorescent bead. (B) Best fitting 2D Gaussian function for the bead image. (C) 2D Gaussian superimposed on the bead image. (D) X-y image of a stable paRFP-labeled synaptic vesicle in the terminal of a zebrafish BPC. (E) Best fitting 2D Gaussian function for the paRFP image. (F) 2D Gaussian superimposed on the paRFP image.

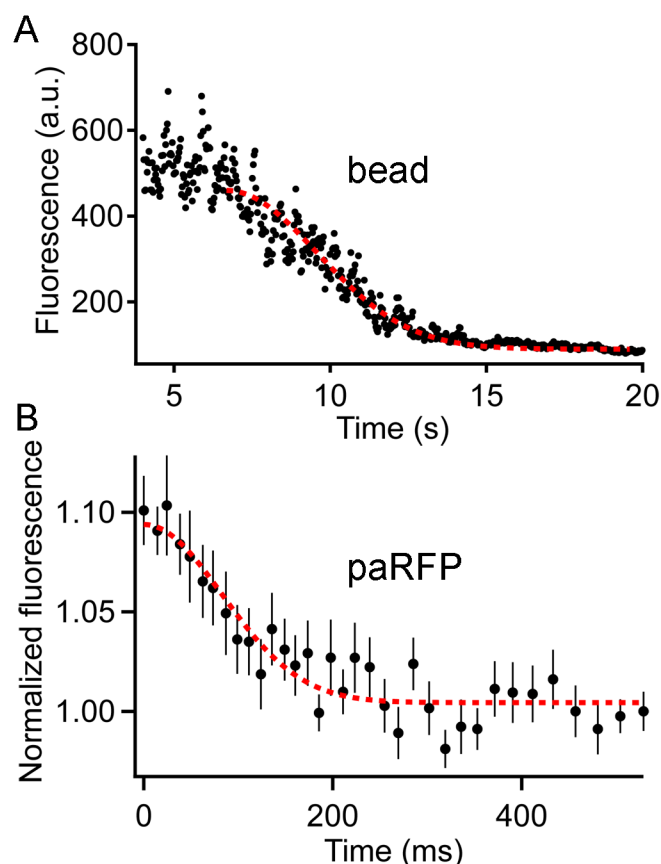

**Figure 4-figure supplement 1: Fluorescence of an emitter declines along a Gaussian time course as the emitter moves away from the region of a line scan. (A)** The fluorescence of a 27-nm fluorescent bead sampled by a line scan as the bead moved progressively away from the line position. The dashed red line is the best-fitting Gaussian decline. **(B)** Time course of fluorescence decline for 11 paRFP-labeled synaptic vesicles that disappeared from the scanned line during sustained depolarization. The dashed red line is the best-fitting Gaussian decline.

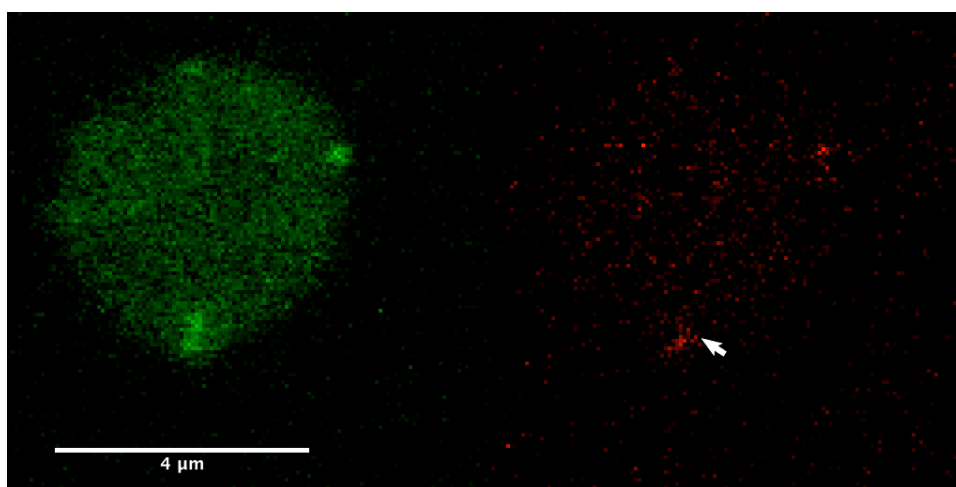

**Supplementary Movie 1: Time-lapse movie of the synaptic terminal of a zebrafish bipolar neuron after photoactivation of Vglut1-paRFP.** The arrow points to a stable vesicle present throughout, and mobile vesicles appear as transient flashes or streaks of red fluorescence during the x-y raster scans. Interval between frames: 3.77 s. Total duration of movie: 245 s. Each frame is an individual, unaveraged image.

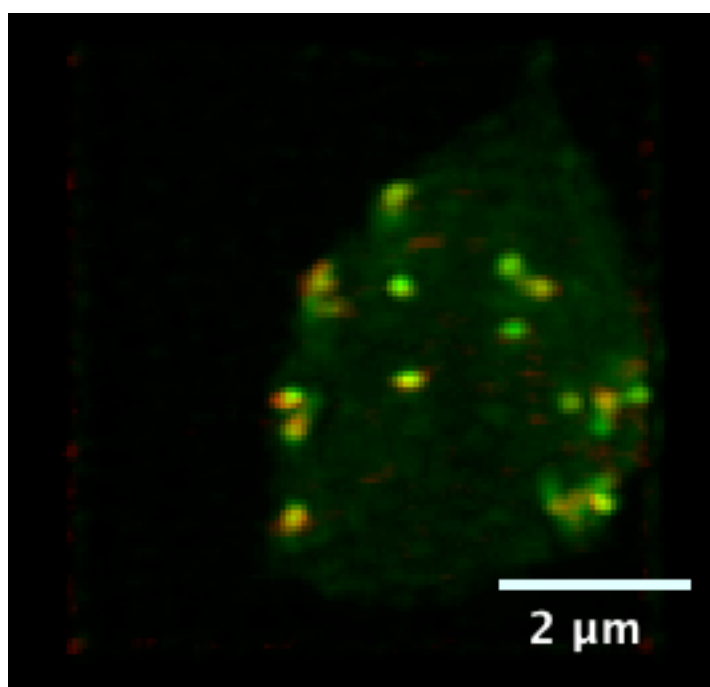

**Supplementary Movie 2: 3D reconstruction of a living synaptic terminal of a zebrafish bipolar neuron from a z-axis series of confocal optical sections.** Red spots are stable paRFP-labeled synaptic vesicles, and green spots are synaptic ribbons labeled with RBP.
